# Supplementary material
Source: MDPI journal article supplement (https://www.mdpi.com/2071-1050/15/18/13463)
Supplement: s1 [file s1]

Supplemental Table S1. Market rice element concentrations (see Method section 2.2 and 2.3)

| Market # | Replicate # | Al    | Fe    | Ca    | K     | Mg    | Na    | Mn    | P     | V     | Cr    | Mn    | Co    | Ni    | Cu    | Zn    | Ga    | As    | Se    | Rb    | Sr    | Zr    | Mo    | Cd    | W     | Pb    | Th    | U     |
|----------|-------------|-------|-------|-------|-------|-------|-------|-------|-------|-------|-------|-------|-------|-------|-------|-------|-------|-------|-------|-------|-------|-------|-------|-------|-------|-------|-------|-------|
|          |             | mg/kg |
| 1        | 1           | 44    | 56    | 102   | 1324  | 609   | 142   | 9.16  | 2032  | 68.31 | 0.34  | 4.36  | 0.04  | 0.34  | 37.7  | 53.8  | 0.03  | 1.26  | 0.07  | 1.42  | 0.12  | 0.15  | 0.15  | 0.11  | 0.10  | 0.55  | 0.01  | 0.01  |
| 1        | 2           | 29    | 39    | 86    | 1316  | 597   | 249   | 9.92  | 1970  | 67.46 | 0.36  | 4.51  | 0.02  | 0.27  | 23.4  | 42.3  | 0.03  | 1.25  | 0.11  | 1.71  | 0.07  | 0.14  | 0.18  | 0.07  | 0.07  | 0.25  | 0.00  | 0.01  |
| 1        | 3           | 30    | 37    | 86    | 1275  | 632   | 216   | 9.19  | 2068  | 22.28 | 0.17  | 3.06  | 0.02  | 0.24  | 19.5  | 46.0  | 0.02  | 0.59  | 0.12  | 1.27  | 0.06  | 0.08  | 0.13  | 0.06  | 0.04  | 0.22  | 0.00  | 0.01  |
| 2        | 1           | 48    | 90    | 91    | 1006  | 471   | 203   | 11.74 | 1736  | 28.30 | 0.20  | 6.12  | 0.03  | 0.43  | 109.5 | 212.9 | 0.03  | 0.88  | 0.07  | 1.92  | 0.04  | 0.18  | 0.25  | 0.16  | 0.06  | 1.56  | 0.00  | 0.01  |
| 2        | 2           | 66    | 50    | 98    | 1156  | 473   | 268   | 12.64 | 1728  | 36.96 | 0.23  | 6.75  | 0.03  | 2.53  | 157.0 | 172.1 | 0.03  | 0.96  | 0.09  | 3.03  | 0.05  | 0.16  | 0.31  | 0.13  | 0.06  | 1.74  | 0.00  | 0.00  |
| 2        | 3           | 72    | 205   | 83    | 942   | 466   | 105   | 13.27 | 1720  | 76.54 | 0.35  | 7.71  | 0.03  | 0.60  | 111.2 | 158.9 | 0.03  | 1.34  | 0.07  | 1.77  | 0.03  | 0.21  | 0.28  | 0.09  | 0.04  | 1.93  | 0.00  | 0.00  |
| 3        | 1           | 34    | 30    | 69    | 756   | 298   | 229   | 10.39 | 1309  | 21.02 | 0.12  | 4.77  | 0.01  | 0.32  | 11.5  | 39.8  | 0.02  | 0.58  | 0.05  | 1.34  | 0.02  | 0.13  | 0.24  | 0.14  | 0.02  | 0.52  | 0.00  | 0.01  |
| 3        | 2           | 29    | 33    | 73    | 640   | 244   | 165   | 11.21 | 1164  | 17.88 | 0.11  | 5.46  | 0.03  | 0.42  | 11.1  | 35.2  | 0.02  | 0.45  | 0.08  | 1.14  | 0.01  | 0.09  | 0.18  | 0.23  | 0.02  | 0.32  | 0.00  | 0.01  |
| 3        | 3           | 28    | 48    | 98    | 940   | 273   | 201   | 10.56 | 1292  | 38.85 | 0.14  | 3.88  | 0.02  | 1.40  | 7.6   | 52.8  | 0.02  | 0.88  | 0.09  | 2.19  | 0.01  | 0.08  | 0.17  | 0.14  | 0.04  | 5.25  | 0.00  | 0.01  |
| 4        | 1           | 58    | 67    | 121   | 1153  | 749   | 185   | 14.11 | 2332  | 26.45 | 0.20  | 6.86  | 0.03  | 1.32  | 150.5 | 283.5 | 0.03  | 0.69  | 0.11  | 2.72  | 0.04  | 0.15  | 0.30  | 0.11  | 0.03  | 5.80  | 0.00  | 0.00  |
| 4        | 2           | 74    | 91    | 163   | 1232  | 744   | 155   | 15.63 | 2345  | 44.03 | 0.25  | 6.10  | 0.03  | 0.94  | 136.8 | 206.4 | 0.03  | 0.96  | 0.09  | 2.90  | 0.06  | 0.15  | 0.27  | 0.17  | 0.02  | 6.03  | 0.00  | 0.01  |
| 4        | 3           | 20    | 122   | 58    | 890   | 453   | 91    | 8.31  | 1646  | 22.67 | 0.13  | 4.06  | 0.02  | 0.50  | 40.7  | 27.3  | 0.02  | 0.61  | 0.20  | 1.43  | 0.02  | 0.12  | 0.26  | 0.09  | 0.02  | 1.99  | 0.00  | 0.01  |
| 5        | 1           | 86    | 52    | 130   | 1510  | 758   | 237   | 10.22 | 2432  | 20.46 | 0.18  | 5.11  | 0.03  | 0.73  | 57.2  | 128.9 | 0.04  | 0.74  | 0.09  | 1.85  | 0.09  | 0.11  | 0.18  | 0.07  | 0.04  | 0.62  | 0.01  | 0.02  |
| 5        | 2           | 57    | 42    | 90    | 1367  | 727   | 131   | 8.93  | 2348  | 30.77 | 0.15  | 2.85  | 0.02  | 0.23  | 47.5  | 42.9  | 0.02  | 0.74  | 0.12  | 1.67  | 0.07  | 0.09  | 0.13  | 0.06  | 0.06  | 0.46  | 0.01  | 0.02  |
| 5        | 3           | 68    | 45    | 104   | 1414  | 731   | 213   | 8.95  | 2309  | 50.89 | 0.20  | 3.69  | 0.02  | 0.36  | 40.8  | 65.2  | 0.04  | 0.94  | 0.12  | 1.63  | 0.08  | 0.06  | 0.18  | 0.43  | 0.01  | 0.59  | 0.00  | 0.00  |
| 6        | 1           | 90    | 50    | 86    | 982   | 527   | 160   | 9.32  | 1882  | 35.27 | 0.20  | 4.50  | 0.02  | 0.74  | 6.4   | 50.2  | 0.04  | 0.77  | 0.06  | 1.48  | 0.02  | 0.22  | 0.23  | 0.11  | 0.01  | 0.30  | 0.02  | 0.02  |
| 6        | 2           | 96    | 128   | 109   | 1043  | 589   | 218   | 12.03 | 1959  | 21.80 | 0.28  | 6.17  | 0.03  | 1.15  | 9.1   | 72.2  | 0.04  | 0.72  | 0.08  | 1.73  | 0.04  | 0.19  | 0.33  | 0.10  | 0.01  | 0.40  | 0.00  | 0.00  |
| 6        | 3           | 59    | 154   | 115   | 978   | 544   | 153   | 11.24 | 1891  | 48.87 | 0.27  | 5.96  | 0.03  | 0.75  | 24.0  | 38.6  | 0.04  | 1.13  | 0.10  | 1.51  | 0.03  | 0.31  | 0.28  | 0.80  | 0.03  | 1.74  | 0.00  | 0.01  |
| 7        | 1           | 108   | 80    | 233   | 1739  | 1037  | 355   | 16.17 | 2956  | 41.67 | 0.30  | 9.34  | 0.03  | 5.95  | 68.2  | 149.5 | 0.05  | 0.99  | 0.09  | 3.97  | 0.08  | 0.22  | 0.29  | 0.29  | 0.01  | 3.17  | 0.00  | 0.01  |
| 7        | 2           | 98    | 330   | 217   | 1776  | 1010  | 201   | 18.19 | 2951  | 34.80 | 0.35  | 11.86 | 0.04  | 3.85  | 201.8 | 169.2 | 0.05  | 1.04  | 0.06  | 3.99  | 0.05  | 0.12  | 0.32  | 0.42  | 0.02  | 6.66  | 0.00  | 0.01  |
| 7        | 3           | 100   | 941   | 151   | 1881  | 985   | 187   | 19.06 | 2881  | 29.86 | 0.45  | 13.83 | 0.09  | 2.39  | 99.4  | 160.8 | 0.06  | 0.81  | 0.08  | 4.27  | 0.08  | 0.22  | 0.40  | 0.29  | 0.06  | 17.95 | 0.00  | 0.00  |
| 8        | 1           | 107   | 132   | 139   | 2181  | 1502  | 111   | 23.79 | 4180  | 19.75 | 0.30  | 17.57 | 0.04  | 0.74  | 111.4 | 216.4 | 0.07  | 0.77  | 0.10  | 3.49  | 0.05  | 0.22  | 0.28  | 0.13  | 0.03  | 0.59  | 0.00  | 0.00  |
| 8        | 2           | 106   | 99    | 144   | 2183  | 1466  | 144   | 22.77 | 4098  | 24.39 | 0.21  | 15.91 | 0.03  | 4.41  | 95.3  | 262.8 | 0.06  | 0.75  | 0.09  | 3.61  | 0.04  | 0.15  | 0.31  | 0.19  | 0.02  | 0.91  | 0.00  | 0.00  |
| 8        | 3           | 22    | 33    | 68    | 1543  | 465   | 179   | 9.87  | 1998  | 9.88  | 0.14  | 4.97  | 0.02  | 2.92  | 9.1   | 57.6  | 0.03  | 0.44  | 0.10  | 3.24  | 0.03  | 0.17  | 0.28  | 0.11  | 0.04  | 0.59  | 0.00  | 0.00  |
| 9        | 1           | 30    | 45    | 86    | 1844  | 622   | 212   | 21.10 | 2396  | 22.02 | 0.21  | 14.10 | 0.02  | 3.43  | 9.5   | 56.3  | 0.04  | 0.74  | 0.09  | 4.16  | 0.03  | 0.22  | 0.37  | 0.17  | 0.01  | 0.86  | 0.00  | 0.00  |
| 9        | 2           | 33    | 342   | 83    | 1785  | 591   | 156   | 12.83 | 2325  | 14.31 | 0.16  | 6.39  | 0.02  | 0.36  | 68.1  | 27.2  | 0.03  | 0.70  | 0.07  | 4.18  | 0.02  | 0.15  | 0.19  | 0.61  | 0.00  | 4.20  | 0.00  | 0.01  |
| 9        | 3           | 80    | 106   | 135   | 2206  | 1537  | 86    | 22.68 | 4269  | 27.18 | 0.21  | 15.64 | 0.04  | 2.12  | 103.8 | 219.2 | 0.06  | 0.67  | 0.08  | 3.51  | 0.06  | 0.22  | 0.39  | 0.11  | 0.04  | 0.58  | 0.00  | 0.01  |
| 10       | 1           | 76    | 64    | 167   | 1578  | 1083  | 221   | 19.45 | 2998  | 19.01 | 0.24  | 12.62 | 0.04  | 6.97  | 20.3  | 192.2 | 0.05  | 0.54  | 0.10  | 4.21  | 0.05  | 0.14  | 0.18  | 0.16  | 0.02  | 1.44  | 0.00  | 0.01  |
| 10       | 2           | 82    | 88    | 142   | 1628  | 1087  | 154   | 15.97 | 2967  | 17.96 | 0.17  | 10.83 | 0.03  | 1.81  | 20.8  | 92.3  | 0.04  | 0.51  | 0.07  | 4.37  | 0.04  | 0.15  | 0.27  | 0.31  | 0.01  | 0.82  | 0.00  | 0.01  |
| 10       | 3           | 92    | 93    | 155   | 1468  | 1036  | 112   | 14.01 | 2936  | 18.54 | 0.13  | 9.42  | 0.03  | 5.82  | 21.8  | 329.0 | 0.05  | 0.54  | 0.04  | 4.03  | 0.05  | 0.11  | 0.28  | 0.14  | 0.01  | 1.94  | 0.00  | 0.06  |
| 11       | 1           | 124   | 69    | 196   | 1343  | 341   | 187   | 9.46  | 1549  | 18.63 | 0.16  | 5.12  | 0.04  | 2.63  | 9.5   | 98.2  | 0.04  | 0.55  | 0.12  | 3.66  | 0.05  | 0.16  | 0.23  | 0.13  | 0.03  | 1.37  | 0.00  | 0.01  |
| 11       | 2           | 108   | 92    | 111   | 1328  | 321   | 182   | 10.53 | 1506  | 10.05 | 0.18  | 5.75  | 0.03  | 2.13  | 9.1   | 46.8  | 0.04  | 0.46  | 0.11  | 3.97  | 0.04  | 0.15  | 0.18  | 0.21  | 0.02  | 1.36  | 0.00  | 0.01  |
| 11       | 3           | 121   | 60    | 124   | 1398  | 362   | 377   | 10.42 | 1510  | 17.05 | 0.27  | 6.34  | 0.03  | 5.04  | 33.2  | 81.9  | 0.04  | 0.53  | 0.10  | 4.01  | 0.06  | 0.13  | 0.21  | 0.15  | 0.03  | 2.32  | 0.00  | 0.01  |

Supplemental Table S2. Drinking water element concentrations (see Method section 2.2 and 2.3)

| Sample name     | Socioecon (SES) group | Replicate | Al    | Fe    | Ca    | K     | Mg    | Na    | Mn    | Ni    | P     | S     | Sr    | V    | Cr   | Mn   | Co   | Ni        | Cu   | Zn    | Ga    | As    | Se    | Rb   | Sr    | Cd    | Pb    | Th    | U      |      |
|-----------------|-----------------------|-----------|-------|-------|-------|-------|-------|-------|-------|-------|-------|-------|-------|------|------|------|------|-----------|------|-------|-------|-------|-------|------|-------|-------|-------|-------|--------|------|
|                 |                       | #         | mg/kg | ng/g | ng/g | ng/g | ng/g | ng/g      | ng/g | ng/g  | ng/g  | ng/g  | ng/g  | ng/g | ng/g  | ng/g  | ng/g  | ng/g  | ng/g   | ng/g |
| Aziz Bhatti     | Middle+Wealthy        | 1         | 0.052 | 0.133 | 110   | 20.2  | 72    | 44    | 0.008 | 0.001 | 0.015 | 127   | 2.32  | 0.17 | 0.06 | 0.13 | 0.20 | 16.1      | 1.15 | 7.5   | 0.021 | 49.0  | 0.18  | 0.69 | 246   | 0.005 | 0.031 | 0.006 | 0.08   |      |
| Aziz Bhatti     | Middle+Wealthy        | 2         | 0.064 | 0.168 | 121   | 24.4  | 87    | 48    | 0.009 | 0.001 | 0.013 | 150   | 2.67  | 0.14 | 0.05 | 0.14 | 0.20 | 20.6      | 0.99 | 8.9   | 0.018 | 59.8  | 0.17  | 0.81 | 234   | 0.005 | 0.039 | 0.006 | 0.06   |      |
| Aziz Bhatti     | Middle+Wealthy        | 3         | 0.040 | 0.099 | 99    | 15.9  | 57    | 40    | 0.007 | 0.000 | 0.017 | 104   | 1.97  | 0.19 | 0.07 | 0.13 | 0.20 | 11.6      | 1.31 | 6.2   | 0.024 | 38.2  | 0.18  | 0.56 | 259   | 0.005 | 0.024 | 0.006 | 0.09   |      |
| Cantt           | Middle+Wealthy        | 1         | 0.079 | 0.176 | 34    | 5.5   | 25    | 106   | 0.003 | 0.005 | 0.030 | 48    | 0.62  | 0.32 | 0.11 | 0.02 | 0.06 | 3.7       | 1.12 | 1.5   | 0.004 | 6.7   | 0.67  | 5.05 | 127   | 0.008 | 0.024 | 0.070 | 4.10   |      |
| Cantt           | Middle+Wealthy        | 2         | 0.098 | 0.222 | 37    | 6.7   | 30    | 116   | 0.003 | 0.007 | 0.026 | 57    | 0.71  | 0.27 | 0.09 | 0.02 | 0.06 | 4.7       | 0.96 | 1.7   | 0.003 | 8.1   | 0.66  | 5.96 | 121   | 0.008 | 0.030 | 0.066 | 3.36   |      |
| Cantt           | Middle+Wealthy        | 3         | 0.061 | 0.130 | 30    | 4.4   | 20    | 97    | 0.002 | 0.004 | 0.034 | 40    | 0.53  | 0.37 | 0.12 | 0.02 | 0.06 | 2.7       | 1.28 | 1.2   | 0.004 | 5.2   | 0.68  | 4.14 | 134   | 0.009 | 0.019 | 0.073 | 4.84   |      |
| Data Gunj Baksh | Middle+Wealthy        | 1         | 0.023 | 0.041 | 26    | 3.9   | 11    | 51    | 0.003 | 0.001 | 0.034 | 27    | 0.38  | 0.10 | 0.09 | 0.36 | 0.16 | 14.4      | 1.04 | 3.6   | 0.008 | 55.8  | 0.13  | 0.60 | 294   | 0.011 | 0.063 | 0.005 | 1.11   |      |
| Data Gunj Baksh | Middle+Wealthy        | 2         | 0.029 | 0.052 | 29    | 4.7   | 14    | 55    | 0.003 | 0.001 | 0.030 | 32    | 0.44  | 0.09 | 0.08 | 0.38 | 0.16 | 18.5      | 0.89 | 4.2   | 0.006 | 68.1  | 0.12  | 0.70 | 279   | 0.011 | 0.079 | 0.005 | 0.91   |      |
| Data Gunj Baksh | Middle+Wealthy        | 3         | 0.018 | 0.031 | 24    | 3.1   | 9     | 46    | 0.002 | 0.000 | 0.038 | 22    | 0.32  | 0.12 | 0.10 | 0.34 | 0.16 | 10.4      | 1.18 | 2.9   | 0.009 | 43.5  | 0.13  | 0.49 | 309   | 0.012 | 0.048 | 0.005 | 1.31   |      |
| Gulberg         | Middle+Wealthy        | 1         | 0.125 | 0.392 | 19    | 15.6  | 39    | 179   | 0.003 | 0.003 | 0.024 | 90    | 0.29  | 0.01 | 0.01 | 0.01 | 0.01 | 0.0       | 0.01 | 0.0   | 0.023 | 0.0   | 0.02  | 0.01 | 2     | 0.012 | 0.015 | 0.501 | 0.01   |      |
| Gulberg         | Middle+Wealthy        | 2         | 0.153 | 0.494 | 21    | 18.9  | 48    | 195   | 0.004 | 0.003 | 0.021 | 107   | 0.34  | 0.01 | 0.01 | 0.01 | 0.01 | 0.0       | 0.01 | 0.0   | 0.020 | 0.0   | 0.02  | 0.01 | 2     | 0.012 | 0.019 | 0.476 | 0.01   |      |
| Gulberg         | Middle+Wealthy        | 3         | 0.096 | 0.290 | 17    | 12.3  | 31    | 163   | 0.003 | 0.002 | 0.027 | 74    | 0.25  | 0.01 | 0.01 | 0.01 | 0.01 | 0.0       | 0.01 | 0.0   | 0.027 | 0.0   | 0.02  | 0.01 | 2     | 0.012 | 0.011 | 0.526 | 0.01   |      |
| Iqbal Town N    | Impoverished          | 1         | 0.052 | 0.098 | 68    | 12.1  | 57    | 128   | 0.007 | 0.001 | 0.029 | 158   | 0.95  | 1.97 | 0.22 | 0.17 | 0.05 | 2.0       | 1.04 | 1.2   | 0.001 | 2.5   | 0.57  | 0.13 | 170   | 0.129 | 0.013 | 0.021 | 117.52 |      |
| Iqbal Town N    | Impoverished          | 2         | 0.064 | 0.123 | 74    | 14.6  | 69    | 139   | 0.008 | 0.002 | 0.026 | 186   | 1.09  | 1.65 | 0.19 | 0.18 | 0.05 | 2.6       | 0.90 | 1.4   | 0.001 | 3.0   | 0.57  | 0.16 | 161   | 0.126 | 0.016 | 0.020 | 96.36  |      |
| Iqbal Town N    | Impoverished          | 3         | 0.040 | 0.072 | 61    | 9.5   | 45    | 116   | 0.006 | 0.001 | 0.033 | 129   | 0.81  | 2.28 | 0.24 | 0.16 | 0.05 | 1.4       | 1.19 | 1.0   | 0.002 | 1.9   | 0.58  | 0.11 | 178   | 0.131 | 0.010 | 0.022 | 138.67 |      |
| Iqbal Town S    | Impoverished          | 1         | 0.021 | 0.049 | 12    | 2.7   | 8     | 125   | 0.001 | 0.002 | 0.046 | 49    | 0.24  | 0.98 | 0.18 | 0.62 | 0.38 | 36.3      | 7.86 | 24.4  | 0.002 | 4.9   | 188.5 | 0.28 | 503   | 0.021 | 0.172 | 0.005 | 39.43  |      |
| Iqbal Town S    | Impoverished          | 2         | 0.025 | 0.062 | 14    | 3.2   | 10    | 136   | 0.001 | 0.002 | 0.040 | 58    | 0.27  | 0.82 | 0.15 | 0.65 | 0.37 | 46.5      | 6.76 | 28.8  | 0.002 | 5.9   | 186.7 | 0.33 | 477   | 0.020 | 0.213 | 0.004 | 32.33  |      |
| Iqbal Town S    | Impoverished          | 3         | 0.016 | 0.036 | 11    | 2.1   | 7     | 113   | 0.001 | 0.001 | 0.051 | 40    | 0.20  | 1.14 | 0.20 | 0.59 | 0.38 | 26.1      | 8.96 | 20.0  | 0.003 | 3.8   | 190.4 | 0.23 | 528   | 0.021 | 0.130 | 0.005 | 46.53  |      |
| Nishtar N       | Impoverished          | 1         | 0.055 | 0.068 | 52    | 10.0  | 54    | 186   | 0.002 | 0.007 | 0.014 | 139   | 1.15  | 0.63 | 0.13 | 0.65 | 0.49 | 46.4      | 0.27 | 2.1   | 0.003 | 6.2   | 24.67 | 0.18 | 644   | 0.006 | 0.018 | 0.009 | 43.62  |      |
| Nishtar N       | Impoverished          | 2         | 0.068 | 0.085 | 57    | 12.1  | 65    | 203   | 0.002 | 0.009 | 0.012 | 164   | 1.32  | 0.53 | 0.12 | 0.68 | 0.49 | 59.3      | 0.23 | 2.5   | 0.002 | 7.6   | 24.42 | 0.22 | 612   | 0.006 | 0.022 | 0.009 | 35.77  |      |
| Nishtar N       | Impoverished          | 3         | 0.042 | 0.050 | 47    | 7.9   | 42    | 169   | 0.002 | 0.005 | 0.015 | 114   | 0.98  | 0.73 | 0.15 | 0.62 | 0.49 | 33.4      | 0.31 | 1.8   | 0.003 | 4.8   | 24.92 | 0.15 | 676   | 0.006 | 0.014 | 0.010 | 51.47  |      |
| Nishtar S       | Impoverished          | 1         | 0.035 | 0.059 | 16    | 9.3   | 18    | 327   | 0.005 | 0.004 | 0.014 | 143   | 0.41  | 0.53 | 0.17 | 0.02 | 0.25 | 22.211.21 | 14.1 | 0.001 | 13.0  | 25.85 | 0.41  | 521  | 0.014 | 0.113 | 0.006 | 42.25 |        |      |
| Nishtar S       | Impoverished          | 2         | 0.043 | 0.074 | 18    | 11.2  | 22    | 357   | 0.006 | 0.005 | 0.012 | 169   | 0.47  | 0.45 | 0.15 | 0.02 | 0.25 | 28.4      | 9.64 | 16.6  | 0.001 | 15.8  | 25.59 | 0.48 | 495   | 0.013 | 0.140 | 0.006 | 34.64  |      |
| Nishtar S       | Impoverished          | 3         | 0.027 | 0.044 | 15    | 7.3   | 14    | 298   | 0.005 | 0.003 | 0.016 | 118   | 0.35  | 0.62 | 0.19 | 0.02 | 0.25 | 16.012.78 | 11.6 | 0.001 | 10.1  | 26.11 | 0.33  | 547  | 0.014 | 0.086 | 0.007 | 49.85 |        |      |
| Ravi            | Middle+Wealthy        | 1         | 0.031 | 0.052 | 23    | 1.9   | 9     | 25    | 0.002 | 0.004 | 0.019 | 13    | 0.35  | 0.16 | 0.12 | 0.02 | 0.05 | 3.9       | 1.57 | 28.8  | 0.013 | 31.1  | 0.37  | 0.39 | 142   | 0.041 | 0.034 | 0.006 | 12.23  |      |
| Ravi            | Middle+Wealthy        | 2         | 0.038 | 0.066 | 26    | 2.3   | 11    | 27    | 0.002 | 0.005 | 0.016 | 16    | 0.41  | 0.14 | 0.10 | 0.02 | 0.05 | 5.0       | 1.35 | 34.0  | 0.011 | 38.0  | 0.37  | 0.46 | 135   | 0.040 | 0.042 | 0.006 | 10.03  |      |
| Ravi            | Middle+Wealthy        | 3         | 0.024 | 0.039 | 21    | 1.5   | 7     | 22    | 0.001 | 0.003 | 0.021 | 11    | 0.30  | 0.19 | 0.13 | 0.02 | 0.05 | 2.8       | 1.79 | 23.6  | 0.015 | 24.3  | 0.38  | 0.32 | 149   | 0.042 | 0.026 | 0.006 | 14.43  |      |
| Shalimar        | Impoverished          | 1         | 0.068 | 0.160 | 28    | 4.9   | 17    | 66    | 0.004 | 0.004 | 0.046 | 36    | 0.48  | 0.09 | 0.07 | 0.08 | 0.21 | 16.7      | 0.66 | 2.0   | 0.019 | 51.7  | 0.09  | 0.83 | 258   | 0.003 | 0.853 | 0.025 | 0.05   |      |
| Shalimar        | Impoverished          | 2         | 0.084 | 0.201 | 31    | 6.0   | 21    | 72    | 0.005 | 0.005 | 0.040 | 43    | 0.55  | 0.08 | 0.06 | 0.09 | 0.21 | 21.4      | 0.57 | 2.3   | 0.016 | 63.1  | 0.09  | 0.98 | 246   | 0.003 | 1.058 | 0.023 | 0.04   |      |
| Shalimar        | Impoverished          | 3         | 0.053 | 0.118 | 25    | 3.9   | 13    | 60    | 0.004 | 0.003 | 0.051 | 30    | 0.40  | 0.11 | 0.07 | 0.08 | 0.21 | 12.0      | 0.75 | 1.6   | 0.022 | 40.3  | 0.09  | 0.68 | 271   | 0.003 | 0.649 | 0.026 | 0.06   |      |
| Wagha N         | Impoverished          | 1         | 0.066 | 0.083 | 61    | 12.0  | 47    | 32    | 0.007 | 0.003 | 0.016 | 42    | 1.12  | 0.21 | 0.14 | 0.47 | 0.38 | 36.4      | 0.66 | 0.6   | 0.002 | 3.3   | 59.55 | 0.27 | 263   | 0.005 | 0.012 | 0.042 | 119.73 |      |
| Wagha N         | Impoverished          | 2         | 0.081 | 0.105 | 67    | 14.5  | 57    | 35    | 0.008 | 0.003 | 0.014 | 49    | 1.29  | 0.18 | 0.13 | 0.49 | 0.37 | 46.6      | 0.56 | 0.8   | 0.002 | 4.0   | 58.95 | 0.32 | 250   | 0.005 | 0.015 | 0.040 | 98.18  |      |
| Wagha N         | Impoverished          | 3         | 0.050 | 0.062 | 55    | 9.4   | 37    | 29    | 0.006 | 0.002 | 0.017 | 34    | 0.95  | 0.24 | 0.16 | 0.45 | 0.38 | 26.2      | 0.75 | 0.5   | 0.003 | 2.6   | 60.14 | 0.22 | 276   | 0.005 | 0.009 | 0.045 | 141.28 |      |
| Wagha S         | Impoverished          | 1         | 0.062 | 0.092 | 82    | 17.1  | 45    | 174   | 0.008 | 0.003 | 0.014 | 165   | 0.59  | 0.16 | 0.10 | 0.05 | 0.16 | 12.9      | 0.59 | 19.1  | 0.004 | 22.1  | 0.50  | 0.47 | 313   | 0.008 | 0.015 | 0.052 | 4.99   |      |
| Wagha S         | Impoverished          | 2         | 0.077 | 0.115 | 90    | 20.7  | 55    | 190   | 0.009 | 0.003 | 0.012 | 194   | 0.68  | 0.14 | 0.08 | 0.05 | 0.16 | 16.6      | 0.51 | 22.6  | 0.003 | 26.9  | 0.49  | 0.55 | 297   | 0.008 | 0.019 | 0.050 | 4.09   |      |
| Wagha S         | Impoverished          | 3         | 0.048 | 0.068 | 74    | 13.5  | 36    | 159   | 0.007 | 0.002 | 0.016 | 135   | 0.50  | 0.19 | 0.11 | 0.04 | 0.16 | 9.3       | 0.68 | 15.7  | 0.005 | 17.2  | 0.50  | 0.39 | 328   | 0.008 | 0.011 | 0.055 | 5.88   |      |
